# Supplementary material
Source: PubMed Central journal article supplement (PMC6353637)
Supplement: NIHMS1004429-supplement-1.pdf [file NIHMS1004429-supplement-1.pdf]

## Supplemental Information for

### **Low q Bicelles are Mixed Micelles**

Tracy A. Caldwell<sup>††</sup>, Svetlana Baoukina<sup>†§</sup>, Ashton T. Brock<sup>†</sup>, Ryan C. Oliver<sup>†</sup>, Kyle T. Root<sup>‡</sup>,  
Joanna K. Krueger<sup>#</sup>, Kerney Jebrell Glover<sup>⊥</sup>, D. Peter Tieleman<sup>§</sup>, Linda Columbus<sup>\*†</sup>

<sup>†</sup>Department of Chemistry, University of Virginia, Charlottesville, Virginia 22904, United States

<sup>§</sup>Department of Biological Sciences and Centre for Molecular Simulation, University of Calgary, Calgary, Alberta, Canada

<sup>‡</sup>Department of Chemistry, Lock Haven University, Lock Haven, Pennsylvania, United States

<sup>#</sup>Department of Chemistry, The University of North Carolina at Charlotte, Charlotte, North Carolina, United States

<sup>⊥</sup>Department of Chemistry, Lehigh University, Bethlehem, Pennsylvania, United States

## Methods

### Preparation of bicelle samples

For SAXS, mixtures of DMPC/DHPC were prepared from  $q = 0.1$  to  $1.0$  in increments of  $0.1$  at 6% total amphiphile weight per volume in 10 mM phosphate buffer, pH 6.6 with 7% D<sub>2</sub>O and diluted with buffer to adjust the total amphiphile concentration as needed. A freeze-thaw cycle was performed on mixtures which were not optically transparent after vortex mixing. For SANS experiments, similar mixtures were prepared at  $q = 0.3$  and  $0.7$  for 6% total amphiphile concentrations using DMPC-d<sub>54</sub>, an analog of DMPC with deuterated acyl chains, as the lipid component.

For fluorescence anisotropy experiments, 2.3% (w/w) DMPC – DHPC mixtures having  $q$  values ranging from 0 to 1.50 (0.05, 0.30, 0.50, 0.75, 1.00, 1.50) were prepared on a 3-gram scale using the following methodology. First, a DMPC stock was made by dissolving the lipid to 50 mg/mL in chloroform. To a 2 mL microcentrifuge tube, DMPC in chloroform was added (83, 370, 510, 630, 720, and 827  $\mu$ L respectively). After this, DPH dissolved in methanol was added to each tube to give a final concentration of 6  $\mu$ M. The samples were then dried under vacuum overnight. The samples were then hydrated by the addition of 2.78 mL of water, and 75  $\mu$ L buffer (400 mM HEPES, 4.0 M NaCl pH 7.4). Finally, DHPC was added as a 25% (w/w) stock to achieve clear homogeneous solutions (250, 196, 169, 146, 129, and 107  $\mu$ L respectively).

Vesicles were prepared by dissolving 16 mg of DMPC in 600  $\mu$ L of chloroform. To this DPH dissolved in methanol was added to give a final concentration of 30  $\mu$ M (1:500 DPH to lipid molar ratio). The sample was then dried under vacuum overnight. The sample was then rehydrated using 2.78 mL of water and 75  $\mu$ L buffer (400 mM HEPES, 4.0 M NaCl pH 7.4). This solution was sonicated for 5 minutes using a microtip to generate small unilamellar vesicles. The solution became clear and was then centrifuged at 20,000 x g for 5 minutes to remove titanium and large lipid aggregates. This solution was then allowed to sit 12 hours to allow fusion of small unilamellar vesicles. The solution was then centrifuged at 20,000 x g for 5 minutes. The supernatant was diluted 4 fold and was then used in fluorescence experiments.

### SAXS acquisition

Small-angle scattering measurements were collected at the Advanced Photon Source (Argonne, IL) and processed as described previously.<sup>1-2</sup>

### SANS acquisition

Solvent deuteration was modified for contrast variation experiments by changing the D<sub>2</sub>O content in the buffer from 0% to 99% via dialysis. Neutron scattering data were obtained at the High-Flux Isotope Reactor (Oak Ridge, TN). The experimental match point for each data set was calculated from the square root of the total signal intensity as a function of the percentage of D<sub>2</sub>O in the solvent.<sup>3</sup>

### SANS Fitting Approach

The SasView cylinder-based core-shell bicelle model was used for all data fits. The scattering length density (SLD) of the solvent was calculated using known SLD values of  $-5.5 \times 10^{-7} \text{ \AA}^{-2}$  and  $6.3 \times 10^{-6} \text{ \AA}^{-2}$  for H<sub>2</sub>O and D<sub>2</sub>O, respectively. The chemical composition of the phosphocholineheadgroup along with reported molecular volume was used to calculate the face SLD to be  $1.44 \times 10^{-6} \text{ \AA}^{-2}$ .<sup>4</sup> This procedure was repeated to determine SLDs for whole DHPC ( $6.71 \times 10^{-7} \text{ \AA}^{-2}$ ), whole d54-DMPC ( $5.39 \times 10^{-6} \text{ \AA}^{-2}$ ), DHPC tail ( $-7.49 \times 10^{-8} \text{ \AA}^{-2}$ ), and d54-DMPC tail ( $7.04 \times 10^{-6} \text{ \AA}^{-2}$ ).<sup>5-8</sup> Ratios of DHPC and d54-DMPC whole lipid SLDs were calculated for the rim SLD, while ratios of DHPC and d54-DMPC tails were calculated for the core SLD. These SLD values were confirmed using the online resource MULCh: modules for the analysis of contrast variation data.<sup>9</sup> The face thickness range was set to 7-12 Å based on known length of the phosphocholineheadgroup while the rim thickness range was set between 10-25 Å based on the lengths of DHPC and d54-DMPC.<sup>4, 7-8, 10</sup> The original length range was 15-36 Å based on the lengths of two DMPC or DHPC tails as well as the SAXS data. The radius started at 20 Å but had no set range since there was no prior evidence to the radius length. The  $q=0.7$  6% (w/w) total amphiphile concentration ( $C_L$ ) and  $q=0.3$  6%  $C_L$  Q ranges were set as 0.02-0.20 and 0.035-0.3 respectively to remove noise. The following solvent D<sub>2</sub>O percentages were fit for each set based on available data as well as not fitting within 20% of the contrast match point (CMP):  $q=0.7$  6%  $C_L$ : 0, 10, 20, 30, 80, 90, 100; and  $q=0.3$  6%  $C_L$ : 0, 10, 20, 70, 80, 90, 100. All spectra in a set were fit using the above parameter ranges and SLD values corresponding to the amount of mixing observed in the MD simulations ( $q=0.3$ : 76% DHPC and 24% DMPC corresponding to a core

SLD of  $1.64 \times 10^{-6} \text{ \AA}^{-2}$  and a rim SLD of  $1.80 \times 10^{-6} \text{ \AA}^{-2}$ ;  $q=0.7$ : 49% DHPC and 51% DMPC corresponding to a core SLD of  $3.56 \times 10^{-6} \text{ \AA}^{-2}$  and a rim SLD of  $3.08 \times 10^{-6} \text{ \AA}^{-2}$ ). The SLD values were then allowed to vary and values for radius, rim thickness, face thickness, and length as well as SLDs for core and rim were converged upon after several rounds of fitting. The percent of DHPC and DMPC in the core and rim (Table 1, Table S1, Table S2, Table S5) were calculated by the ratios of pure DHPC and DMPC SLDs (Table S3) [ $\text{SLD} = (\% \text{DMPC})(\text{DMPC SLD}) + (\% \text{DHPC})(\text{DHPC SLD})$ ] where the percentages of DMPC and DHPC add to 100%. The radii (Table 1) were calculated as  $\text{radius} + \text{rim}$  and  $\frac{1}{2} \text{length} + \text{face thickness}$  (Figure S4).

### Anisotropy Measurements and Curve Fitting

Fluorescence emission spectra were acquired with magnetic stirring using a  $1 \times 1$  cm quartz cuvette on an Agilent Eclipse fluorometer (Santa Clara, CA). The excitation and emission slit widths were both set to 5 nm. The fluorescence emission intensity was measured (excitation 355 nm, emission 430 nm) with polarizers parallel to each other (both oriented at  $0^\circ$  from vertical) and repeated in the perpendicular configuration (excitation  $0^\circ$  and emission  $90^\circ$ ). The correction factor for emission monochromator transmission efficiency was obtained from the ratio of emission intensity at  $0^\circ$  and  $90^\circ$  with the excitation polarizer oriented at  $90^\circ$ . Melting curves were generated for both pure DMPC vesicles and DMPC-DHPC bicelles by examining the change in DPH anisotropy as a function of temperature over the range of 2 - 36  $^\circ\text{C}$ . Each melting temperature was determined from the inflection point of the melting curve using a sigmoidal fit in Igor Pro 6.22A (WaveMetrics, Inc., Lake Oswego, OR). Melting temperatures obtained represent the average of two experiments.

### Molecular dynamics (MD) simulations

We performed MD simulations for mixtures of DMPC (lipid) and DHPC (detergent) in water. The Gromacs v. 4.6.5 software<sup>11</sup> with the Stockholm lipid (Slipid) force field<sup>12-14</sup> and TIP3p water model<sup>15</sup> were used. The starting configuration constituted a loose spherical aggregate of DMPC and DHPC in a water cube. The ratio of DMPC/DHPC was varied to produce a range of  $q$ -values (0.3 and 0.7), resulting in 6 different system setups with varying numbers of lipids and detergents in the box. The summary of simulations is given in Table S6. The hydration level was selected at 1/400 lipid (and detergent) to water

ratio, which corresponds to  $\sim 100$  mM and  $\sim 9\%$ w/v. Aggregation of lipids and detergents in the course of simulation resulted in one or more bicelles/micelles in the simulation box. We considered the largest and most stable aggregate for each setup; the actual number of molecules in the considered aggregate was therefore lower than the total number of molecules in the box. Note that the actual  $q$ -value of the aggregate differed from the total value in the box (see Table S6).

The standard simulation parameters for Slipids force field were used. The temperature was maintained at 303 K with the  $v$ -rescale thermostat<sup>16</sup> with a relaxation time of 1 ps. The pressure was maintained at 1 bar with the isotropic coupling scheme and Parinello-Rahman barostat<sup>17</sup> with the time constant of 3 ps. A cut-off of 1 nm was used for van der Waals and electrostatic interactions; the energy-pressure dispersion correction and the PME method<sup>18-19</sup> were used for long-range interactions. The integration time step was 2 fs, the neighbor list was updated every 10 steps. The simulation time was 1 microsecond for each setup.

To characterize the mixing of lipids and detergents, we calculated the enrichment values of DHPC around DMPC. The enrichment value is given by the ratio of the local concentration of DHPC around DMPC to the bulk concentration (defined as the molar ratio of DHPC and corresponding to  $1/(q+1)$  at the given  $q$ -value). The calculations were performed using custom python scripts employing MDAnalysis library<sup>20</sup>. To characterize the bicelle shape, the bicelle headgroup layer was fitted to a 3D ellipsoid using custom Matlab scripts, and the principal radii of the ellipsoid were calculated. We also calculated the SAXS scattering profiles of the bicelle structures obtained in MD using FoXS software.<sup>21</sup>

*This work benefitted from SasView software, originally developed by the DANSE project under NSF award DMR-0520547*

## References

1. Lipfert, J.; Columbus, L.; Chu, V. B.; Lesley, S. A.; Doniach, S., Size and shape of detergent micelles determined by small-angle X-ray scattering. *J. Phys. Chem. B* **2007**, *111* (43), 12427-12438.
2. Oliver, R. C.; Lipfert, J.; Fox, D. A.; Lo, R. H.; Doniach, S.; Columbus, L., Dependence of micelle size and shape on detergent alkyl chain length and head group. *PloS one* **2013**, *8* (5), e62488.
3. *A SANS Experiment to Understand the Nature of Surfactant Stabilization in Suspensions of Spherical Colloidal Silica Particles*; NIST Center for Neutron Research: Summer School on Neutron Scattering and Reflectometry from Submicron Structures, 2004.
4. Kucerka, N.; Kiselev, M. A.; Balgavy, P., Determination of bilayer thickness and lipid surface area in unilamellar dimyristoylphosphatidylcholine vesicles from small-angle neutron scattering curves: a comparison of evaluation methods. *Eur Biophys J* **2004**, *33* (4), 328-34.
5. Kiselev, M. A., Zemlyanaya, E. V., and Aswal, V. K., Sans study of the unilamellar DMPC vesicles. The fluctuation model of lipid bilayer.
6. Kucerka, N.; Tristram-Nagle, S.; Nagle, J. F., Structure of fully hydrated fluid phase lipid bilayers with monounsaturated chains. *J Membr Biol* **2005**, *208* (3), 193-202.
7. Tanford, C., *The hydrophobic effect: formation of micelles and biological membranes*. Wiley: New York, 1973.
8. Triba, M. N.; Warschawski, D. E.; Devaux, P. F., Reinvestigation by phosphorus NMR of lipid distribution in bicelles. *Biophys J* **2005**, *88* (3), 1887-901.
9. Whitten, A. E.; Cai, S. Z.; Trehwella, J., MULCh: modules for the analysis of small-angle neutron contrast variation data from biomolecular assemblies. *J Appl Crystallogr* **2008**, *41*, 222-226.
10. Nagle, J. F.; Tristram-Nagle, S., Structure of lipid bilayers. *Biochim Biophys Acta* **2000**, *1469* (3), 159-95.
11. Hess, B.; Kutzner, C.; van der Spoel, D.; Lindahl, E., GROMACS 4: Algorithms for Highly Efficient, Load-Balanced, and Scalable Molecular Simulation. *Journal of Chemical Theory and Computation* **2008**, *4* (3), 435-447.
12. Jambeck, J. P. M.; Lyubartsev, A. P., An Extension and Further Validation of an All-Atomistic Force Field for Biological Membranes. *Journal of Chemical Theory and Computation* **2012**, *8* (8), 2938-2948.
13. Jambeck, J. P. M.; Lyubartsev, A. P., Derivation and Systematic Validation of a Refined All-Atom Force Field for Phosphatidylcholine Lipids. *Journal of Physical Chemistry B* **2012**, *116* (10), 3164-3179.
14. Jambeck, J. P. M.; Lyubartsev, A. P., Another Piece of the Membrane Puzzle: Extending Slipids Further. *Journal of Chemical Theory and Computation* **2013**, *9* (1), 774-784.
15. Jorgensen, W. L.; Chandrasekhar, J.; Madura, J. D.; Impey, R. W.; Klein, M. L., Comparison of Simple Potential Functions for Simulating Liquid Water. *Journal of Chemical Physics* **1983**, *79* (2), 926-935.
16. Bussi, G.; Donadio, D.; Parrinello, M., Canonical sampling through velocity rescaling. *Journal of Chemical Physics* **2007**, *126* (1), 014101.
17. Parrinello, M.; Rahman, A., Polymorphic Transitions in Single-Crystals - a New Molecular-Dynamics Method. *J. Appl. Phys.* **1981**, *52* (12), 7182-7190.
18. Darden, T.; York, D.; Pedersen, L., Particle Mesh Ewald - an N.Log(N) Method for Ewald Sums in Large Systems. *Journal of Chemical Physics* **1993**, *98* (12), 10089-10092.
19. Essmann, U.; Perera, L.; Berkowitz, M. L.; Darden, T.; Lee, H.; Pedersen, L. G., A Smooth Particle Mesh Ewald Method. *Journal of Chemical Physics* **1995**, *103* (19), 8577-8593.
20. Michaud-Agrawal, N.; Denning, E. J.; Woolf, T. B.; Beckstein, O., MDAAnalysis: a toolkit for the analysis of molecular dynamics simulations. *Journal of computational chemistry* **2011**, *32* (10), 2319-27.
21. Schneidman-Duhovny, D.; Hammel, M.; Sali, A., FoXS: a web server for rapid computation and fitting of SAXS profiles. *Nucleic Acids Res* **2010**, *38* (Web Server issue), W540-4.

## Supplemental Tables

| <b>Table S1: Fit parameters for the SANS profiles for q=0.7 bicelles using the core-shell bicelle model</b> |        |       |      |        |           |          |
|-------------------------------------------------------------------------------------------------------------|--------|-------|------|--------|-----------|----------|
| D <sub>2</sub> O                                                                                            | Radius | Rim   | Face | Length | Core DMPC | Rim DHPC |
| %                                                                                                           | (Å)    |       |      |        | %         |          |
| 0                                                                                                           | 17     | 12    | 7    | 19     | 63        | 59       |
| 10                                                                                                          | 15     | 11    | 7    | 23     | 52        | 49       |
| 20                                                                                                          | 14     | 11    | 7    | 18     | 52        | 49       |
| 30                                                                                                          | 11     | 11    | 7    | 25     | 51        | 49       |
| 80                                                                                                          | 27     | 19    | 12   | 36     | 52        | 49       |
| 90                                                                                                          | 19     | 19    | 12   | 36     | 55        | 52       |
| 100                                                                                                         | 16     | 13    | 7    | 32     | 59        | 51       |
| AVG                                                                                                         | 17     | 15    | 8    | 27     | 55        | 51       |
| Range                                                                                                       | 10-27  | 11-23 | 7-12 | 18-36  | 51-63     | 49-59    |

| <b>Table S2: Fit parameters for the SANS profiles for q=0.3 bicelles using the core-shell bicelle model</b> |        |       |      |        |           |          |
|-------------------------------------------------------------------------------------------------------------|--------|-------|------|--------|-----------|----------|
| D <sub>2</sub> O                                                                                            | Radius | Rim   | Face | Length | Core DMPC | Rim DHPC |
| %                                                                                                           | (Å)    |       |      |        | %         |          |
| 0                                                                                                           | 6      | 12    | 7    | 16     | 24        | 77       |
| 10                                                                                                          | 4      | 13    | 7    | 15     | 23        | 76       |
| 20                                                                                                          | 5      | 10    | 7    | 15     | 32        | 77       |
| 30                                                                                                          | 21     | 10    | 12   | 23     | 24        | 78       |
| 80                                                                                                          | 15     | 11    | 7    | 21     | 60        | 100      |
| 90                                                                                                          | 14     | 11    | 7    | 19     | 62        | 100      |
| 100                                                                                                         | 15     | 11    | 7    | 18     | 56        | 100      |
| AVG                                                                                                         | 11     | 11    | 8    | 18     | 40        | 87       |
| Range                                                                                                       | 4-21   | 10-13 | 7-12 | 15-23  | 23-62     | 76-100   |

| Component                                             | Scattering length density ( $\times 10^{-6} \text{ \AA}^{-2}$ ) |
|-------------------------------------------------------|-----------------------------------------------------------------|
| DMPC with deuterated alkyl chains                     | 5.39                                                            |
| DHPC (rim in ideal bicelle)                           | 0.671                                                           |
| PC head group (face)                                  | 1.44                                                            |
| Deuterated dimyristoyl chains (core in ideal bicelle) | 7.04                                                            |
| Dihexanoyl chains                                     | -0.075                                                          |

| Bulk q value | Effective q value* | Match point (% D <sub>2</sub> O) |                                   |              |
|--------------|--------------------|----------------------------------|-----------------------------------|--------------|
|              |                    | Theoretical for bulk q value     | Theoretical for effective q value | Experimental |
| 0.70         | 0.78               | 54                               | 56                                | 57           |
| 0.30         | 0.32               | 40                               | 41                                | 41           |

\*Effective q-value is calculated by subtracting the critical bicelle concentration (cbc) of DHPC monomer from the overall concentration of amphiphiles ( $q_{\text{eff}} = [\text{DMPC}] / \{[\text{DHPC}] - \text{CBC}\}$   
 $\text{CBC}_{\text{DHPC}} = 7\text{mM}$ )

|                | q=0.7   |        | q=0.3   |        |
|----------------|---------|--------|---------|--------|
|                | Average | Range  | Average | Range  |
| Radius         | 17      | 10-27  | 11      | 4-21   |
| Rim Thickness  | 15      | 11-23  | 11      | 10-13  |
| Face Thickness | 8       | 7 - 12 | 8       | 7 - 12 |
| Length         | 27      | 18-36  | 18      | 15-23  |
| Core % DMPC    | 55      | 51-63  | 40      | 23-62  |
| Rim % DHPC     | 51      | 49-59  | 87      | 76-100 |

| # | n (n*)   | q (q*)    | Rg,nm | L,nm | a,nm | b,nm | c,nm | comment             |
|---|----------|-----------|-------|------|------|------|------|---------------------|
| 1 | 34 (33)  | 0.3 (0.3) | 1.6   | 2.6  | 2.4  | 2    | 1.8  | mixed micelle       |
| 2 | 75 (41)  | 0.3(0.32) | 1.7   | 2.8  | 2.4  | 2.1  | 1.8  | mixed micelle       |
| 3 | 75 (74)  | 0.5(0.51) | 2.1   | 3.5  | 3.0  | 2.5  | 2.3  | ellipsoidal bicelle |
| 4 | 150(110) | 0.5(0.72) | 2.5   | 4.2  | 4.2  | 2.8  | 2.3  | de-mixed bicelle    |
| 5 | 120(116) | 0.7(0.76) | 2.6   | 4.2  | 4.0  | 3.1  | 2.2  | de-mixed bicelle    |
| 6 | 150 (96) | 0.7(0.92) | 2.4   | 4.2  | 3.5  | 3.1  | 2.2  | de-mixed bicelle    |

Here n is total number of lipids and detergents in the simulation box, n\* is the actual number of lipids and detergents in the aggregate, q is q-value (lipid-to-detergent ratio) in the simulation box, q\* is the actual q-value in the bicelle (or micelle), Rg is radius of gyration, L parameter is determined from the second peak of the SAXS profile using FoXS software, a, b, and c are the principal radii of an ellipsoid, fitted to the bicelle surface (headgroups layer).



## Supplemental Figures

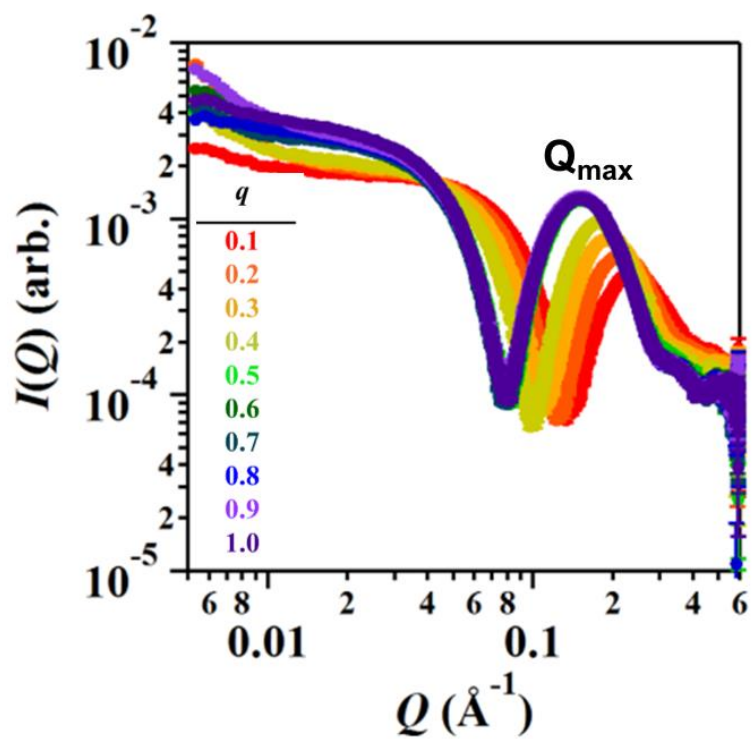

**Figure S1.** SAXS scattering profiles for bicelles with  $q$ -values ranging from 0.1 to 1.

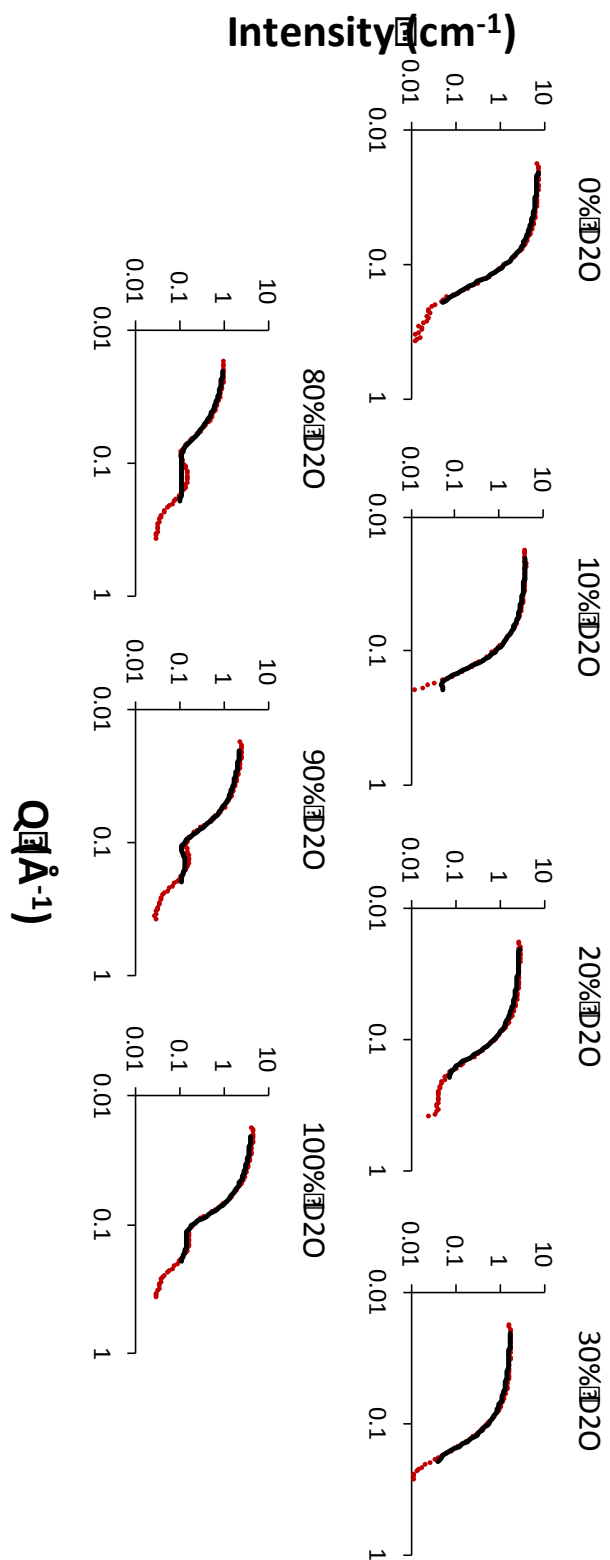

**Figure S2.** Core-shell bicelle model fits (black) to the experimental SANS scattering profiles (red) for  $q = 0.7$  bicelles in different solvent  $D_2O$  concentrations. The parameters are given in Table S1 and a schematic of parameters is provided as Figure S4.

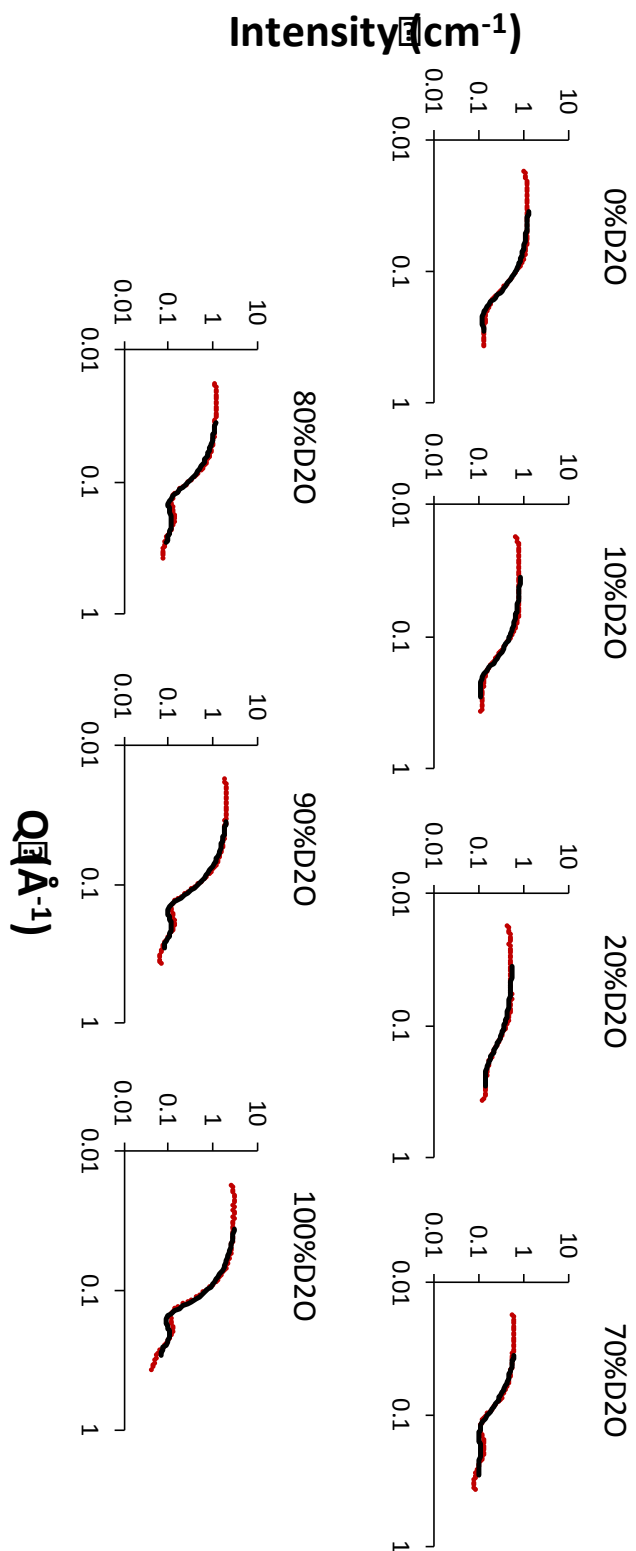

**Figure S3.** Core-shell bicelle model fits (black) to the experimental SANS scattering profiles (red) for  $q = 0.3$  bicelles in different solvent  $D_2O$  concentrations. Parameters are given in Table S2 and a schematic is provided as Figure S4.

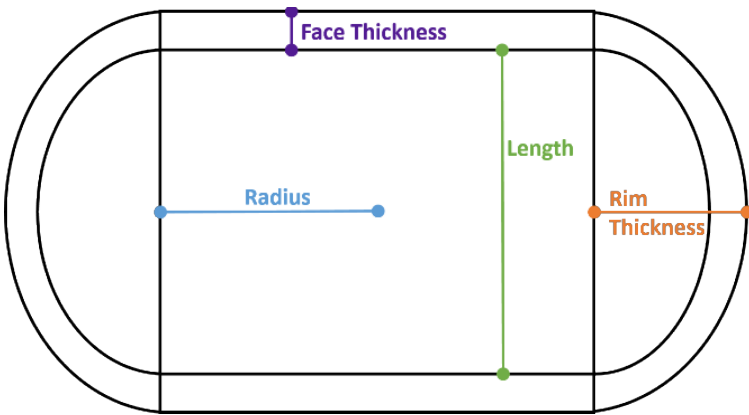

**Figure S4.** Core-shell bicelle model used to fit the experimental SANS scattering profiles.
